# Supplementary material for: Biochemical characterization of variants of canine CYP1A1 using heterologous expression
Source: PubMed Central journal article supplement — J Vet Med Sci. 2017 Jun 24;79(8):1327–34. doi: 10.1292/jvms.17-0192 (PMC5573817; doi:10.1292/jvms.17-0192), 2017-06-24
Supplement: jvms-79-1327-s001.pdf [file jvms-79-1327-s001.pdf]

Table S1. Oligonucleotide primer sequences used for PCR and sequencing reactions.

| Primer        | Oligonucleotide sequence<br>(5' to 3')                    | Description                                                                            |                                                                                        |
|---------------|-----------------------------------------------------------|----------------------------------------------------------------------------------------|----------------------------------------------------------------------------------------|
| CYP1A1-F      | CAG CTG TCT TGA GGT CTC TAC GC                            | Forward primer for cDNA cloning of canine CYP1A1                                       |                                                                                        |
| CYP1A1-R      | ACC CAG ACA GGC CAG GTA GAC AG                            | Reverse primer for cDNA cloning of canine CYP1A1                                       |                                                                                        |
| N-ter-F       | CG CTG GTG CAT ATG GCT TCT ATG<br>TTT AGA CTT TCT ATT CCC | Forward primer for N-terminal modification of canine CYP1A1                            |                                                                                        |
| N-ter-R       | GCT CTA GAC TAG GCT GCA GGG CTC                           | Reverse primer for N-terminal modification of canine CYP1A1                            |                                                                                        |
| Val50-F       | G GGC GTG CCC CTG CTC GGG AAC                             | Forward primer for site-directed mutagenesis of coding sequence of codon 50 into a Val |                                                                                        |
| Val50-R       | CAG GGC CCC GGT GGA CTC TTC AG                            | Reverse primer for site-directed mutagenesis of coding sequence of codon 50 into a Val |                                                                                        |
| Ile50-F       | GC ATT CCC CTG CTC GGG AAC GTG                            | Forward primer for site-directed mutagenesis of coding sequence of codon 50 into a Ile |                                                                                        |
| Ile50-R       | CCC AGG GCC CCG GTG GAC TCT TC                            | Reverse primer for site-directed mutagenesis of coding sequence of codon 50 into a Ile |                                                                                        |
| Met50-F       | GC ATG CCC CTG CTC GGG AAC GTG                            | Forward primer for site-directed mutagenesis of coding sequence of codon 50 into a Met |                                                                                        |
| Met50-R       | CCC AGG GCC CCG GTG GAC TCT TC                            | Reverse primer for site-directed mutagenesis of coding sequence of codon 50 into a Met |                                                                                        |
| Canine CYP1A1 | Phe50-F                                                   | G GGC TTT CCC CTG CTC GGG AAC                                                          | Forward primer for site-directed mutagenesis of coding sequence of codon 50 into a Phe |
|               | Phe50-R                                                   | CAG GGC CCC GGT GGA CTC TTC AG                                                         | Reverse primer for site-directed mutagenesis of coding sequence of codon 50 into a Phe |
|               | Lys50-F                                                   | GC AAG CCC CTG CTC GGG AAC GTG                                                         | Forward primer for site-directed mutagenesis of coding sequence of codon 50 into a Lys |
|               | Lys50-R                                                   | CCC AGG GCC CCG GTG GAC TCT TC                                                         | Reverse primer for site-directed mutagenesis of coding sequence of codon 50 into a Lys |
|               | Asp50-F                                                   | GC GAT CCC CTG CTC GGG AAC GTG                                                         | Forward primer for site-directed mutagenesis of coding sequence of codon 50 into a Asp |
|               | Asp50-R                                                   | CCC AGG GCC CCG GTG GAC TCT TC                                                         | Reverse primer for site-directed mutagenesis of coding sequence of codon 50 into a Asp |
|               | Asn50-F                                                   | GC AAT CCC CTG CTC GGG AAC GTG                                                         | Forward primer for site-directed mutagenesis of coding sequence of codon 50 into a Asn |
|               | Asn50-R                                                   | CCC AGG GCC CCG GTG GAC TCT TC                                                         | Reverse primer for site-directed mutagenesis of coding sequence of codon 50 into a Asn |
|               | genomic-F                                                 | CTT TTA GGC TGT GGC CAA GAC G                                                          | Forward primer for amplification of genomic DNA encompassing codons 50 and 52          |
|               | genomic-R                                                 | GTA ACC AGA GAG AAG CTG TAG AG                                                         | Reverse primer for amplification of genomic DNA encompassing codons 50 and 52          |
|               | genomic-S                                                 | GTT CAG ACT CTC CAT CCC CAT C                                                          | Sequencing primer for DNA encompassing codons 50 and 52                                |
| Human CYP1A1  | W46L-F                                                    | C TTA CCT CTG ATT GGG CAC ATG                                                          | Forward primer for site-directed mutagenesis of coding sequence of Trp46 into a Leu    |
|               | W46L-R                                                    | CCC CAT GGC CCT GGT GGA TTC                                                            | Reverse primer for site-directed mutagenesis of coding sequence of Trp46 into a Leu    |

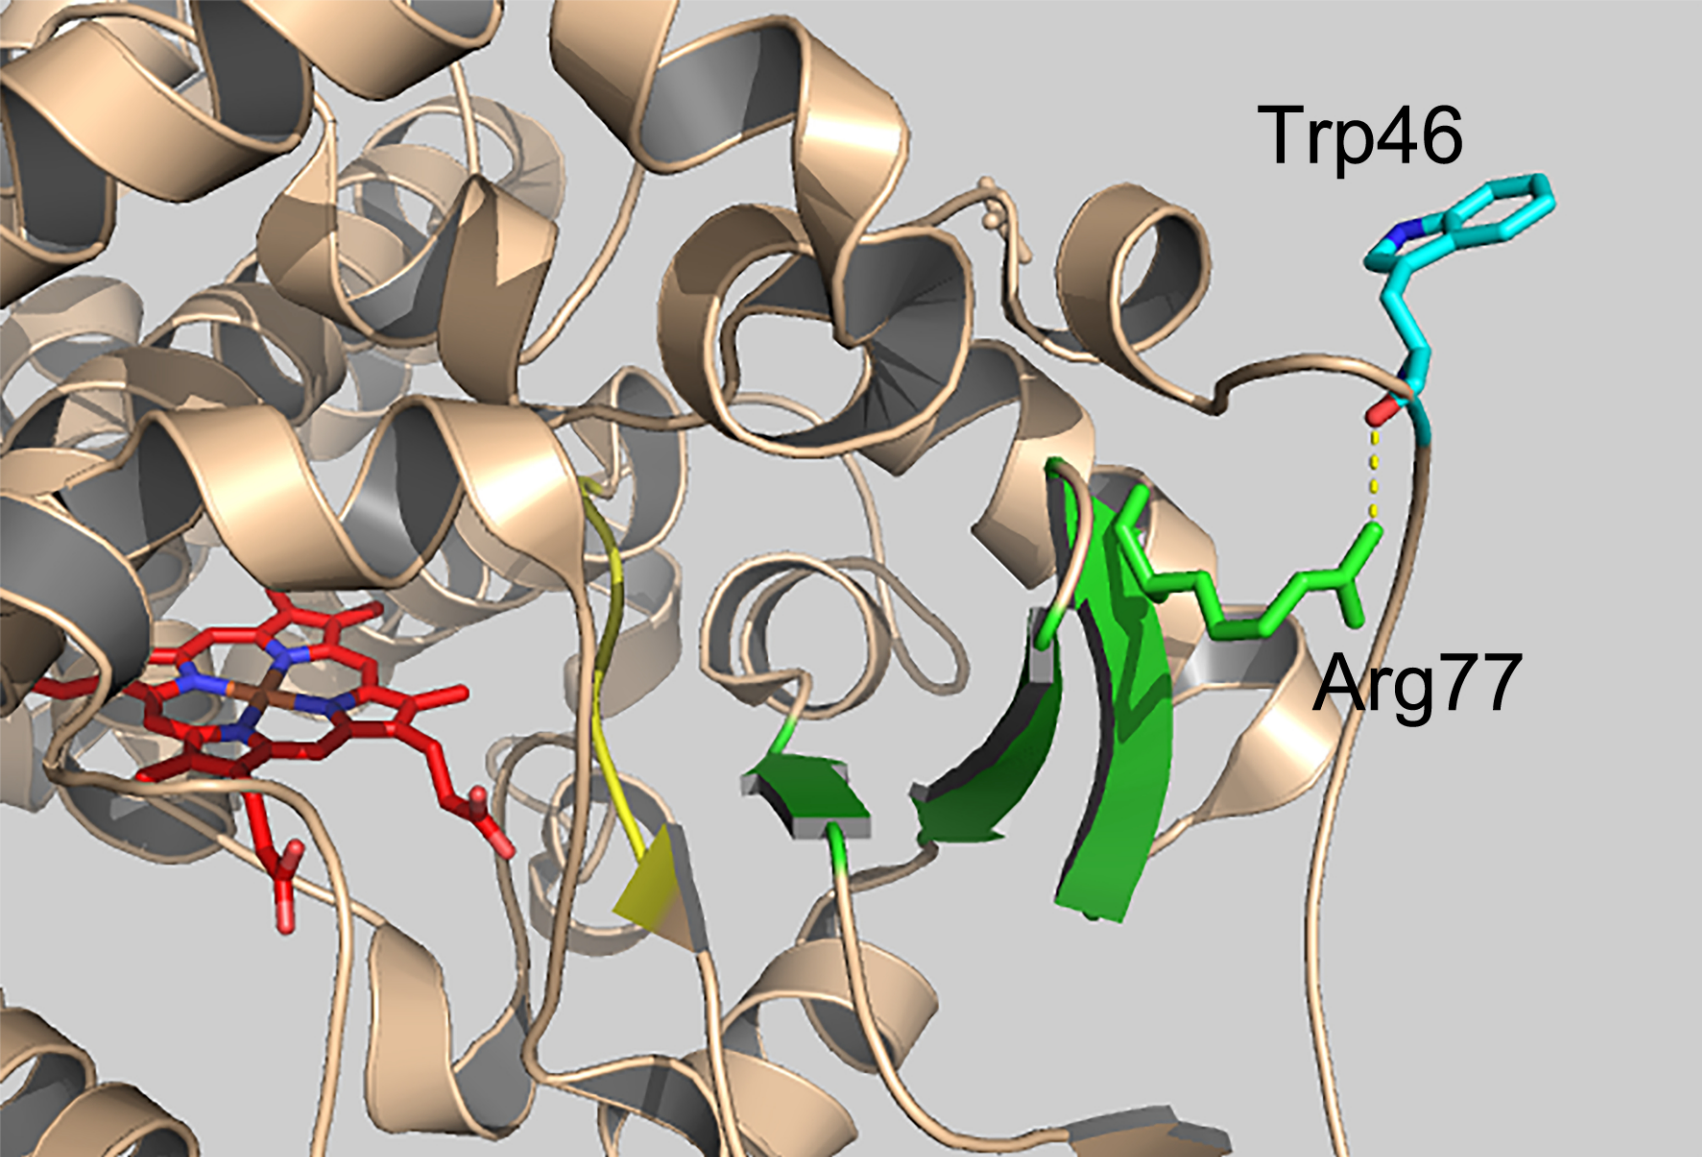

Supplementary Fig. S1. A three-dimensional structure of human CYP1A1 (Hm; PDB ID: 4I8V). A ribbon model of the PR region harboring Trp46 (shown in cyan) and adjacent structural segments such as  $\beta$ -sheet 1 (green), substrate recognition site 5 (yellow) and heme (red). The dotted line indicates a putative hydrogen bond between Trp46 and Arg77.
